# Supplementary material
Source: MDPI journal article supplement (https://www.mdpi.com/2313-0105/9/1/32)
Supplement: s1 [file s1]

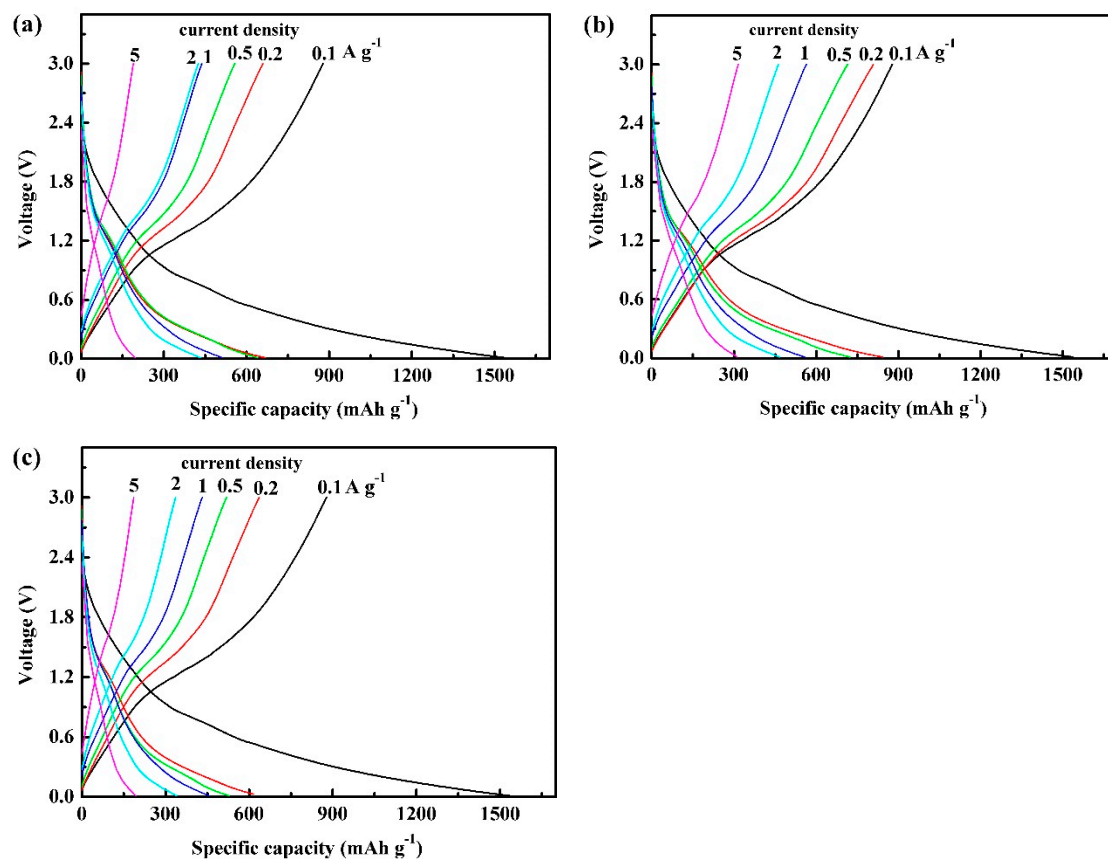

Figure S1. Charge-discharge curves of different current density: (a) MON- QD/NG-500 , (b) MON- QD/NG-600 and (c) MON- QD/NG-700.

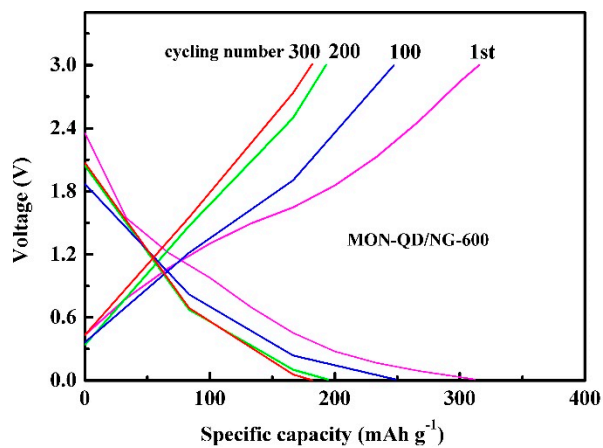

Figure S2. Some selected charge-discharge curves (the first, 100, 200 and 300 cycles) during cycling tests at 5 A g<sup>-1</sup> of MON- QD/NG-600.

**Table S1.** The comparison of molybdenum nitride related anode material for lithium ion battery.

| Materials                         | Reversible specific capacity<br>at 0.1 A g <sup>-1</sup> (m Ah g <sup>-1</sup> ) |
|-----------------------------------|----------------------------------------------------------------------------------|
| Our work                          | 958.9                                                                            |
| Mo <sub>2</sub> N nano-column [1] | 254                                                                              |

|                                                         |                                  |
|---------------------------------------------------------|----------------------------------|
| MoN <sub>x</sub> thin films [2]                         | 700 (at 0.1mA cm <sup>-2</sup> ) |
| 2D MoN [3]                                              | 575                              |
| MoO <sub>2.31</sub> N <sub>0.24</sub> [4]               | 580                              |
| meso-Mo <sub>2</sub> N NBs [5]                          | about 500                        |
| MoN/GNS [6]                                             | 518                              |
| GMON [7]                                                | 960                              |
| Mo <sub>2</sub> N nanolayer coated MoO <sub>2</sub> [8] | 815                              |
| Mo <sub>2</sub> N-QD@MoO <sub>3</sub> @NC[9]            | 928                              |
| MoO <sub>2</sub> -QDs@RGO[10]                           | 1257                             |

[1] Wang L, Li L, Guo X, Zhang J, Liu P, Yan J. Porous Mo<sub>2</sub>N nano-column array thin film electrode for lithium ion storage. *Results in Physics*. 2019;15.

[2] Wang LB, Zhang KL, Pan HL, Wang L, Wang D, Dai WC, et al. 2D molybdenum nitride nanosheets as anode materials for improved lithium storage. *Nanoscale*. 2018;10:18936-41.

[3] Ji W, Shen R, Yang R, Yu G, Guo X, Peng L, et al. Partially nitrated molybdenum trioxide with promoted performance as an anode material for lithium-ion batteries. *J Mater Chem A*. 2014;2:699-704.

[4] Zhang B, Cui G, Zhang K, Zhang L, Han P, Dong S. Molybdenum nitride/nitrogen-doped graphene hybrid material for lithium storage in lithium ion batteries. *Electrochimica Acta*. 2014;150:15-22.

[5] Zhou D, Wu H, Wei Z, Han BH. Graphene-molybdenum oxynitride porous material with improved cyclic stability and rate capability for rechargeable lithium ion batteries. *Phys Chem Chem Phys*. 2013;15:16898-906.

[6] Zheng C, Luo N, Huang S, Wu W, Huang H, Wei M. Nanocomposite of Mo<sub>2</sub>N Quantum Dots@MoO<sub>3</sub>@Nitrogen-Doped Carbon as a High-Performance Anode for Lithium-Ion Batteries. *ACS Sustainable Chemistry & Engineering*. 2019;7:10198-206.

[7] Wang C, Jiang J, Ruan Y, Ao X, Ostrikov K, Zhang W, et al. Construction of MoO<sub>2</sub> Quantum Dot-Graphene and MoS<sub>2</sub> Nanoparticle-Graphene Nanoarchitectures toward Ultrahigh Lithium Storage Capability. *ACS Appl Mater Interfaces*. 2017;9:28441-50.
